# Supplementary material
Source: publisher figshare collection journal article supplement (https://sage.figshare.com/ndownloader/files/40248146)
Supplement: Supplementary file 1 [file 40248146]

## APPENDIX 1 Survey Instrument

Our research team at the University of Waterloo School of Pharmacy is exploring **pharmacists' awareness and understanding of frailty** in various pharmacy practice settings across Canada. We aim to use this information to guide the development of clinical tools that will improve pharmacy-based services for patients living with frailty. We have prepared a short survey to gather your feedback. Participation is voluntary and anonymous. Your perspective, as a Canadian pharmacist, is an essential component of our research and will be of great value.

Q1 Are you currently a licensed practicing pharmacist?

☐ Yes (1)

☐ No (2)

**Thank you for taking part in this survey.** Unfortunately, we are only assessing licensed practicing pharmacists at this time. If you have any comments or feedback, feel free to leave them below.

---

Q2 Are you currently practicing in a Canadian community pharmacy?

☐ Yes (1)

☐ No (2)

Q3 Other than **community pharmacy**, do you work in any other Canadian pharmacy practice settings (e.g. hospital)?

☐ Yes (1)

☐ No (2)

Q4 Please select all other area(s) of pharmacy practice that most relate your workplace(s)  
(select all that apply)

☐

Hospital pharmacy (1)

☐

Long term care (2)

☐

Other (please indicate): (3) \_\_\_\_\_

Q5 What is your current age? (full range not shown)

▼ 24 or younger (1) ... 75 or older (7)

Q6 What is the highest level of **health-related education** you have completed?

- ☐ Bachelor's of Pharmacy (1)
- ☐ PharmD (2)
- ☐ Pharmacy Residency (3)
- ☐ Other (please enter below) (4) \_\_\_\_\_

Q7 In what country did you complete your undergraduate pharmacy degree?

- ☐ Canada (1)
- ☐ United States (2)
- ☐ Other (please indicate) (3) \_\_\_\_\_

Q8 Please indicate the number of **continuous** years you have been practicing **pharmacy** in a **Canadian** jurisdiction (*i.e. no gaps of  $\geq 2$  years*)

- ☐ Less than 1 year (1)
- ☐ 1-5 years (2)
- ☐ 6-10 years (3)
- ☐ 11-15 years (4)
- ☐ 16-20 years (5)
- ☐ 21-40 years (6)
- ☐ More than 40 years (7)

Q9 What gender do identify with?

- ☐ Male (1)
- ☐ Female (2)
- ☐ Other (3)
- ☐ Prefer not to answer (4)

Q10 What Canadian province/territory do you currently **practice community pharmacy** in?

- ☐ Alberta (1)
- ☐ British Columbia (2)
- ☐ Manitoba (3)
- ☐ New Brunswick (4)
- ☐ Newfoundland and Labrador (5)
- ☐ Northwest Territories (6)
- ☐ Nova Scotia (7)
- ☐ Nunavut (8)
- ☐ Ontario (9)
- ☐ Prince Edward Island (10)
- ☐ Quebec (11)
- ☐ Saskatchewan (12)
- ☐ Yukon (13)

Q11 Thinking about the location of the community pharmacy you work in, which term below best describes the **geographical area of your practice**?

- ☐ Large urban population centre (population of 100,000 or more) (1)
- ☐ Medium population centre (population between 30,000 - 99,999) (2)
- ☐ Small population centre (population between 1,000 - 29,999) (3)
- ☐ Rural area (population of less than 1,000) (4)

**Q12 On average**, how many days/week do you practice in community pharmacy?

- ☐ 1 day/week (1)
- ☐ 2 days/week (2)
- ☐ 3 days/week (3)
- ☐ 4 days/week (4)
- ☐ 5 days/week (5)
- ☐ 6 days/week (6)
- ☐ 7 days/week (7)

**Q13** How would you describe your **primary contact method** with physicians?

- ☐ Fax (1)
- ☐ Phone (2)
- ☐ Face-to-face (3)
- ☐ None (4)
- ☐ Other (please indicate) (5) \_\_\_\_\_

**Q14** Please select any certifications you've completed from the list below:  
(select all that apply)

- ☐ Certified Geriatric Pharmacist (CGP) (1)
  - ☐ Certified Diabetes Educator (CDE) (2)
  - ☐ Certified Tobacco Educator (CTE) (3)
  - ☐ Certified Respiratory Educator (CRE) (4)
  - ☐ Additional Prescribing Authorization (5)
  - ☒ No additional certifications completed (6)
  - ☐ Other (please indicate): (7) \_\_\_\_\_
-

Q15 Considering **all** your patient interactions: On average **what proportion of your patients are of female sex?** (move the slider to the appropriate percentage)

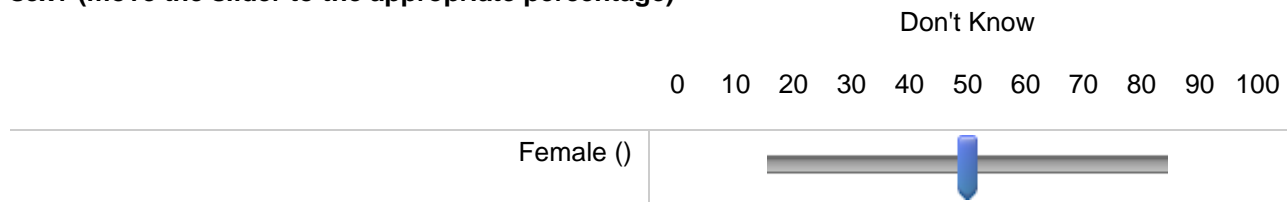

Q16 Considering **all** your patient interactions: On average, **what is the age distribution of your patients?**

- \_\_\_\_\_ Younger than 50 years old (1)
- \_\_\_\_\_ 51 - 60 years old (2)
- \_\_\_\_\_ 61-70 years old (3)
- \_\_\_\_\_ 71-80 years old (4)
- \_\_\_\_\_ More than 80 years old (5)

Q17 On average how many **of your patients  $\geq 65$  years old have some physical impairment that may limit their activities of daily living?**

|                                                            | All (1)               | Majority (2)          | Some (3)              | Minority (4)          | None (5)              | Don't Know (6)        |
|------------------------------------------------------------|-----------------------|-----------------------|-----------------------|-----------------------|-----------------------|-----------------------|
| Proportion of patients with <b>physical impairment</b> (1) | <input type="radio"/> |

Q18 Please describe the most common type(s) of physical impairment you encounter:

\_\_\_\_\_

Q19 On average how many **of your patients  $\geq 65$  years old have some cognitive impairment that may limit their activities of daily living?**

|                                                             | All (1)               | Majority (2)          | Some (3)              | Minority (4)          | None (5)              | Don't Know (6)        |
|-------------------------------------------------------------|-----------------------|-----------------------|-----------------------|-----------------------|-----------------------|-----------------------|
| Proportion of patients with <b>cognitive impairment</b> (1) | <input type="radio"/> |

Q20 Please describe the most common type(s) of **cognitive** impairment you encounter:

\_\_\_\_\_

Q21 How would you define **frailty**?

\_\_\_\_\_  
 \_\_\_\_\_  
 \_\_\_\_\_  
 \_\_\_\_\_  
 \_\_\_\_\_

Q22 On average how many **of your patients ≥65 years old do you consider to live with frailty?**

|                                                | All (1)               | Majority (2)          | Some (3)              | Minority (4)          | None (5)              | Don't Know (6)        |
|------------------------------------------------|-----------------------|-----------------------|-----------------------|-----------------------|-----------------------|-----------------------|
| Proportion of patients living with frailty (1) | <input type="radio"/> |

Q23 Please indicate your level of agreement with this statement:

**It is important for a pharmacist to know a patient's frailty status.**

|                                     | Strongly agree        | Agree                 | Somewhat agree        | Neither agree nor disagree | Somewhat disagree     | Disagree              | Strongly disagree     | Don't Know            |
|-------------------------------------|-----------------------|-----------------------|-----------------------|----------------------------|-----------------------|-----------------------|-----------------------|-----------------------|
| Knowing frailty status is important | <input type="radio"/> | <input type="radio"/> | <input type="radio"/> | <input type="radio"/>      | <input type="radio"/> | <input type="radio"/> | <input type="radio"/> | <input type="radio"/> |

Q24 Please indicate **why** you chose the above answer:

---

Q25 Please indicate your level of agreement with this statement:

**It is important for a pharmacist to assess a patient's frailty status.**

|                                                  | Strongly agree        | Agree                 | Somewhat agree        | Neither agree nor disagree | Somewhat disagree     | Disagree              | Strongly disagree     | Don't Know            |
|--------------------------------------------------|-----------------------|-----------------------|-----------------------|----------------------------|-----------------------|-----------------------|-----------------------|-----------------------|
| Importance of Pharmacists' Assessment of Frailty | <input type="radio"/> | <input type="radio"/> | <input type="radio"/> | <input type="radio"/>      | <input type="radio"/> | <input type="radio"/> | <input type="radio"/> | <input type="radio"/> |

Q26 Please indicate **why** you chose the answer above:

---

Q27 Considering the list below, please **select item(s)** that you believe is/are **related to frailty**:  
(select all that apply)

- ☐ Accumulation of health deficits (1)
- ☐ Approaching end of life (2)
- ☐ Cognitive impairment (3)
- ☐ Decline in functional independence (4)
- ☐ Declining physical performance (e.g. walking speed, grip strength) (5)
- ☐ Falls (6)
- ☐ Hospitalization (7)
- ☐ Multi-morbidity (8)
- ☐ Old age (9)
- ☐ Polypharmacy (10)
- ☐ Social isolation (11)
- ☐ Unintended weight loss (12)
- ☐ Weakness (13)
- ☐ ☒ Don't Know (14)
- ☐ ☒ None of the above (15)

Q28 Do you **assess for frailty** in your pharmacy practice?

- ☐ Yes (1)
- ☐ No (2)
- ☐ Don't Know (3)

Q29 When care planning for your more complex or vulnerable patients, how often do you assess the following areas?

|                                                                            | Always (1)            | Most of the time (2)  | About half the time (3) | Sometimes (4)         | Never (5)             | Don't Know (59)       |
|----------------------------------------------------------------------------|-----------------------|-----------------------|-------------------------|-----------------------|-----------------------|-----------------------|
| <b>Their Overall Appearance</b><br>(using subjective or personal judgment) | <input type="radio"/> | <input type="radio"/> | <input type="radio"/>   | <input type="radio"/> | <input type="radio"/> | <input type="radio"/> |
| <b>Weakness</b><br>(e.g. reduced muscle strength)                          | <input type="radio"/> | <input type="radio"/> | <input type="radio"/>   | <input type="radio"/> | <input type="radio"/> | <input type="radio"/> |
| <b>Gait Speed</b><br>(i.e. patients walking speed)                         | <input type="radio"/> | <input type="radio"/> | <input type="radio"/>   | <input type="radio"/> | <input type="radio"/> | <input type="radio"/> |
| <b>Unintentional Weight loss</b>                                           | <input type="radio"/> | <input type="radio"/> | <input type="radio"/>   | <input type="radio"/> | <input type="radio"/> | <input type="radio"/> |
| <b>Exhaustion or Fatigue</b>                                               | <input type="radio"/> | <input type="radio"/> | <input type="radio"/>   | <input type="radio"/> | <input type="radio"/> | <input type="radio"/> |
| <b>Physical Deficits</b>                                                   | <input type="radio"/> | <input type="radio"/> | <input type="radio"/>   | <input type="radio"/> | <input type="radio"/> | <input type="radio"/> |
| <b>Cognitive Deficits</b>                                                  | <input type="radio"/> | <input type="radio"/> | <input type="radio"/>   | <input type="radio"/> | <input type="radio"/> | <input type="radio"/> |
| <b>Emotional changes</b><br>(e.g. presence of depression)                  | <input type="radio"/> | <input type="radio"/> | <input type="radio"/>   | <input type="radio"/> | <input type="radio"/> | <input type="radio"/> |
| <b>Social Factors</b> (e.g. lives alone)                                   | <input type="radio"/> | <input type="radio"/> | <input type="radio"/>   | <input type="radio"/> | <input type="radio"/> | <input type="radio"/> |

Q30 Please indicate any **assessment methods** you are aware of, including any **assessment tools** you use, when care planning for your more complex or vulnerable patients.

---

Q31 Do you have any comments/feedback?

- ☐ No
- ☐ Yes (please specify below)
